# Supplementary material for: Plant-mediated interspecific horizontal transmission of an intracellular symbiont in insects
Source: PubMed Central journal article supplement (PMC4643326; doi:10.1038/srep15811), 2015-11-13

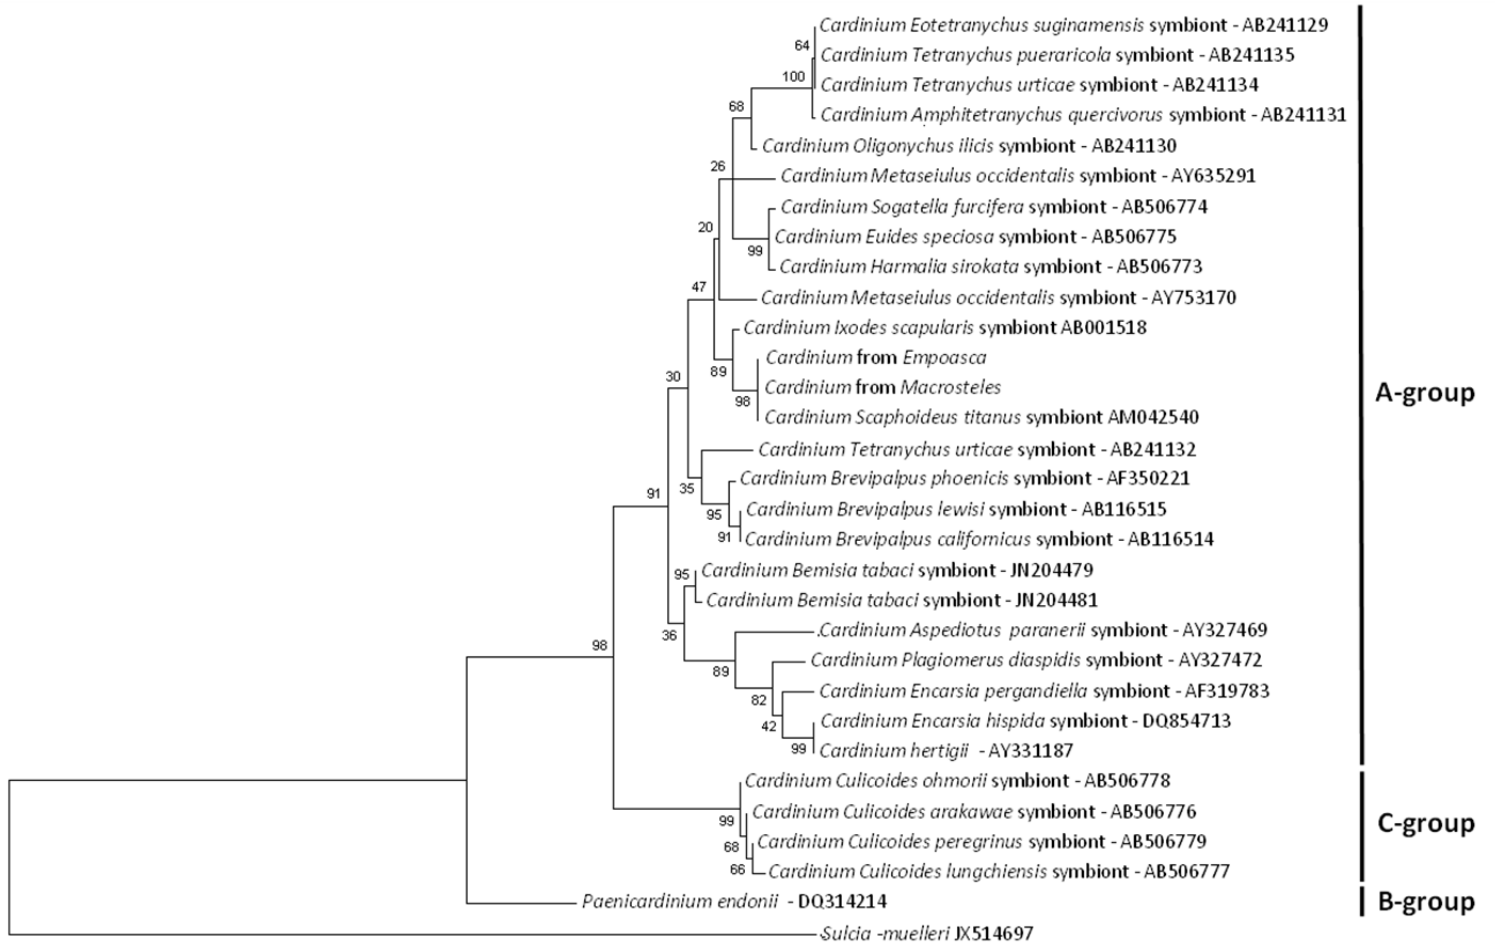

Supplement: srep15811-s6.pdf [file srep15811-s6.pdf]
